# Supplementary material for: MWCNT-intercaleated natural hematite-based activable nanocomposite for piezoelectric energy generation and ROS-mediated carcinogenic dye degradation
Source: Royal Society of Chemistry journal article supplement (doi:10.1039/d4tc02417f), 2024-01-01

## Supporting Information

### **MWCNT Intercalated Natural Hematite-based Activable Nanocomposite for Piezoelectric Energy Generation and ROS-Mediated Carcinogenic Dye Degradation**

Saheli Ghosh<sup>1</sup>, Dhananjay Mondal<sup>1</sup>, Shireen Sultana<sup>1</sup>, Jhilik Roy<sup>1,2</sup>, Neelanjana Bag<sup>1</sup>,  
Anwasha Dey<sup>1</sup>, Ruma Basu<sup>3\*</sup>, Shubham Roy<sup>2\*</sup>, Sukhen Das<sup>1\*</sup>

<sup>1</sup> Department of Physics, Jadavpur University, Kolkata-700032, India

<sup>2</sup> Department of Physics, Jogamaya Devi College, Kolkata- 700026, India

<sup>3</sup> Shenzhen Key Laboratory of Advanced Functional Carbon Materials Research and Comprehensive Application, Shenzhen Key Laboratory of Flexible Printed Electronics Technology, and School of Science, Harbin Institute of Technology, Shenzhen 518055, China

#### **\*Corresponding Authors:**

Prof. Sukhen Das: [sdasphysics@gmail.com](mailto:sdasphysics@gmail.com)

Dr. Ruma Basu: [ruma.b1959@gmail.com](mailto:ruma.b1959@gmail.com)

Dr. Shubham Roy: [shubham.royju@gmail.com](mailto:shubham.royju@gmail.com)

**Figure S1: a) Dielectric constant and b) AC conductivities of MWCNT incorporated hematite nano-rock**

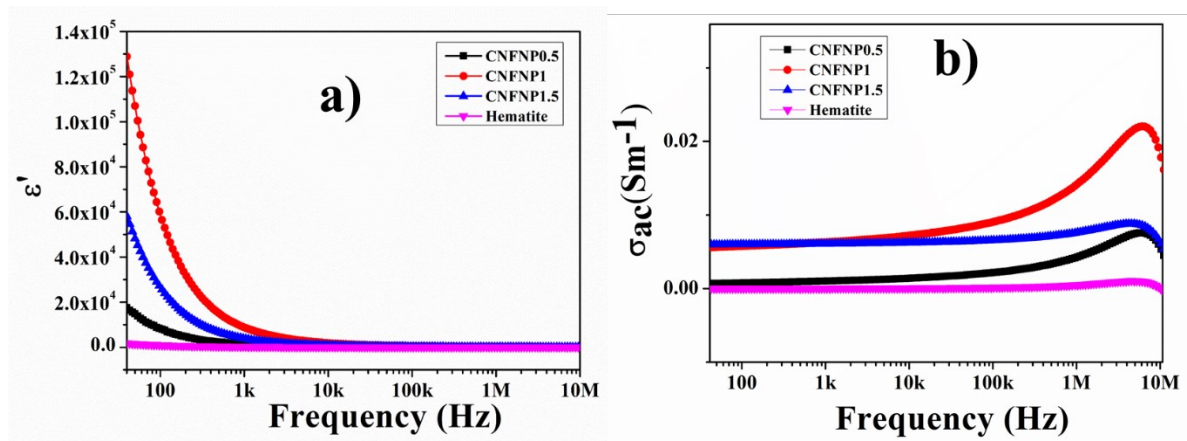

## **S2: Electrical properties of MWCNT-incorporated hematite nano-rock**

To obtain the maximum efficient nanocomposite, 0.5, 1, and 1.5 % wt/wt MWCNT have been incorporated into hematite nano-rock by the condensation technique procedure discussed in the main manuscript in the material synthesis portion and named as CNFNP0.5, CNFNP1.0, and CNFNP1.5 respectively. Figure S1 depicted that the incorporation of MWCNT enhances the electrical polarization properties with MWCNT percentage and found maximum in 1% MWCNT doped nanocomposite. Thus, this sample has been incorporated into PVDF matrix for fabricating nanocomposite membranes.

## **Figure S3: Stress-strain graphs of CNT incorporated $\alpha$ -hematite**

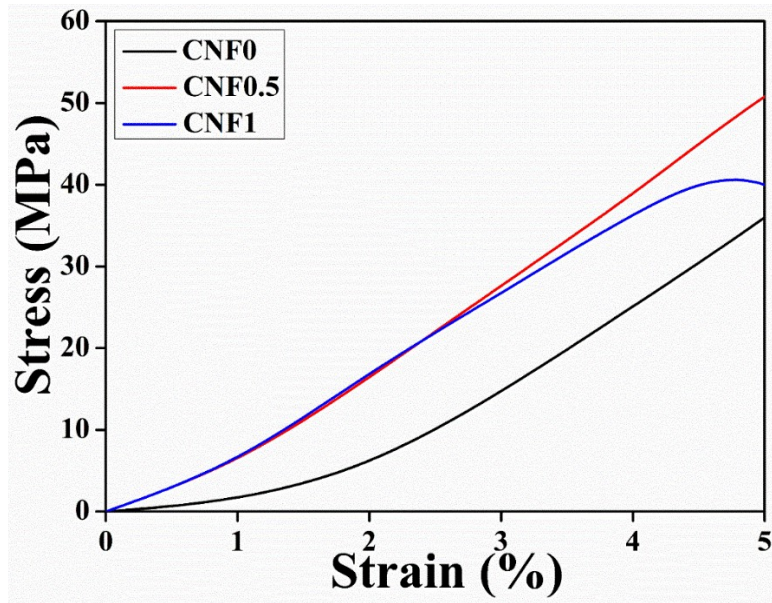

**S4: Formulation of calculation of force**

The velocity was determined using the conservation of energy formula,

$$mgh = \frac{1}{2} mv^2 \dots\dots\dots(1)$$

Where m, g, and h are the mass, the gravitational constant, and the height respectively from whence the mass imparted the membrane, and v is the velocity.

$$mv = (F-mg) \Delta t \dots\dots\dots(2)$$

$$F = m (v/\Delta t + g) \dots\dots\dots(3)$$

Initially, applying the m= 0.015 kg, h=0.1 m, and Δt is the impulsive time derived from the open circuit voltage graph (FWHM) and discovered Δt= 0.0013s

**Figure S5: Impulsive time calculation**

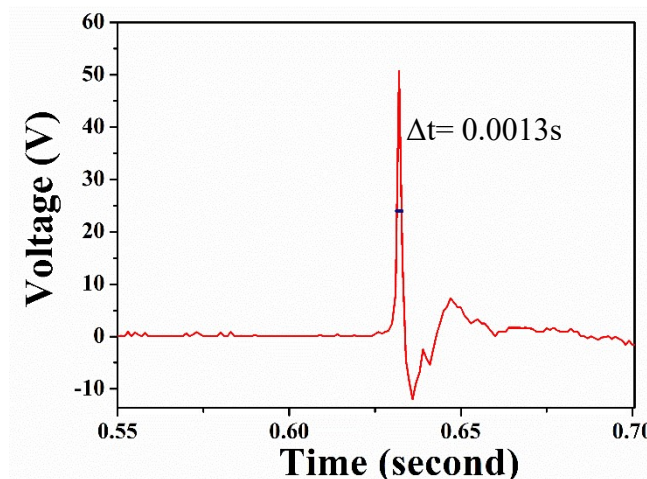

We estimated the force using Equation 3 and found it to be 16.3 N.

### **S6: DFT data of PCNF 0**

CARTESIAN COORDINATES (ANGSTROEM)

-----

|   |            |           |           |
|---|------------|-----------|-----------|
| C | -12.194185 | -2.766798 | 1.713114  |
| C | -11.791043 | -1.365812 | 1.283341  |
| H | -12.185368 | -3.447424 | 0.856618  |
| H | -13.203654 | -2.734075 | 2.132842  |
| H | -11.508243 | -3.142586 | 2.477392  |
| C | -10.395183 | -1.299614 | 0.658407  |
| C | -9.769698  | 0.090510  | 0.486821  |
| H | -10.453995 | -1.793140 | -0.316888 |
| H | -9.709575  | -1.881654 | 1.282532  |
| C | -8.492996  | -0.005203 | -0.360972 |
| C | -7.666419  | 1.272072  | -0.566265 |
| H | -8.774240  | -0.382691 | -1.349858 |
| H | -7.846564  | -0.754926 | 0.107793  |
| C | -6.310263  | 0.943254  | -1.209644 |
| C | -5.404311  | 2.121950  | -1.580927 |
| H | -6.480938  | 0.358806  | -2.119989 |
| H | -5.768021  | 0.305146  | -0.505026 |
| C | -3.987453  | 1.673594  | -1.938933 |
| C | -2.939295  | 2.775792  | -2.135182 |
| H | -4.045682  | 1.101587  | -2.871069 |
| H | -3.624487  | 0.992987  | -1.159667 |
| C | -2.494309  | 3.480981  | -0.829551 |
| C | -0.981718  | 3.666421  | -0.628578 |
| H | -2.877567  | 2.947428  | 0.045248  |
| H | -2.936334  | 4.480960  | -0.794567 |
| C | -0.238278  | 2.368991  | -0.298953 |
| C | 1.238262   | 2.465126  | 0.103423  |
| H | -0.322977  | 1.725270  | -1.175821 |
| H | -0.763056  | 1.877311  | 0.526894  |
| C | 1.878691   | 1.067650  | 0.109853  |

|   |            |           |           |
|---|------------|-----------|-----------|
| C | 3.299450   | 0.956501  | 0.675657  |
| H | 1.886141   | 0.703497  | -0.922780 |
| H | 1.236769   | 0.398362  | 0.692208  |
| C | 3.879342   | -0.449970 | 0.445954  |
| C | 5.311480   | -0.685384 | 0.945210  |
| H | 3.850692   | -0.656251 | -0.629030 |
| H | 3.227466   | -1.175656 | 0.943574  |
| C | 5.839906   | -2.074470 | 0.554732  |
| C | 7.327946   | -2.317187 | 0.787134  |
| H | 5.641083   | -2.251506 | -0.507508 |
| H | 5.282055   | -2.823423 | 1.126193  |
| F | -11.859298 | -0.537039 | 2.374871  |
| F | -12.710079 | -0.902965 | 0.371044  |
| F | -9.473864  | 0.593201  | 1.724362  |
| F | -10.652651 | 0.953223  | -0.097591 |
| F | -7.448294  | 1.885253  | 0.635935  |
| F | -8.358537  | 2.149107  | -1.353757 |
| F | -5.937610  | 2.795117  | -2.652488 |
| F | -5.355286  | 3.016722  | -0.538455 |
| F | -1.848931  | 2.118034  | -2.738974 |
| H | -3.288347  | 3.512306  | -2.864797 |
| F | -0.435987  | 4.263638  | -1.732062 |
| F | -0.836528  | 4.553002  | 0.412782  |
| F | 1.347989   | 3.019998  | 1.348311  |
| F | 1.912435   | 3.283251  | -0.758860 |
| F | 3.285553   | 1.228509  | 2.016354  |
| F | 4.097823   | 1.890770  | 0.081965  |
| F | 5.336995   | -0.564355 | 2.309255  |
| F | 6.138345   | 0.276046  | 0.437862  |
| F | 7.658210   | -2.104642 | 2.092384  |
| F | 8.089889   | -1.490353 | 0.014583  |
| H | 7.600756   | -3.349327 | 0.533424  |

**S7: DFT data of PCNF 0.5**

CARTESIAN COORDINATES (ANGSTROEM)

-----

|   |           |           |           |
|---|-----------|-----------|-----------|
| C | -8.333444 | 1.455904  | -0.365927 |
| C | -7.820822 | 1.777806  | 1.036261  |
| C | -6.301395 | 1.742656  | 1.168256  |
| H | -8.263310 | 1.083027  | 1.758346  |
| H | -8.143861 | 2.786611  | 1.313743  |
| C | -5.670133 | 0.349465  | 1.203891  |
| C | -4.141501 | 0.274280  | 1.092093  |
| H | -6.102608 | -0.270434 | 0.411817  |
| H | -5.938660 | -0.110653 | 2.160208  |
| C | -3.566048 | 0.539442  | -0.297499 |
| C | -2.043754 | 0.485264  | -0.458240 |
| H | -3.866839 | 1.538916  | -0.613686 |
| H | -4.010703 | -0.176601 | -0.995742 |
| C | -1.358450 | -0.867552 | -0.259655 |
| C | 0.167291  | -0.893972 | -0.425462 |
| H | -1.795305 | -1.584677 | -0.961913 |
| H | -1.572085 | -1.226235 | 0.749453  |
| C | 0.721490  | -0.531300 | -1.803586 |
| C | 2.216422  | -0.216969 | -1.894379 |
| H | 0.216446  | 0.363064  | -2.168430 |
| H | 0.484864  | -1.347576 | -2.493341 |
| C | 3.210014  | -1.316485 | -1.519589 |
| C | 4.640932  | -0.812471 | -1.282613 |
| H | 3.235729  | -2.035862 | -2.343757 |
| H | 2.864424  | -1.844744 | -0.627387 |
| C | 4.905967  | -0.320661 | 0.135827  |
| C | 6.192639  | 0.480883  | 0.357584  |
| H | 4.927072  | -1.200139 | 0.785823  |
| H | 4.085255  | 0.322522  | 0.461486  |
| C | 7.474856  | -0.037582 | -0.293825 |
| C | 8.728433  | 0.810111  | -0.060766 |
| H | 7.321390  | -0.072350 | -1.374669 |
| H | 7.663846  | -1.059525 | 0.047655  |
| C | 9.315232  | 0.824923  | 1.347093  |
| C | 10.388490 | 1.886672  | 1.590357  |
| H | 9.740665  | -0.163037 | 1.551243  |

H 8.522058 1.008373 2.073305  
 C 11.509306 1.967173 0.556438  
 F -9.720763 1.489398 -0.354099  
 H -8.022494 0.458613 -0.701352  
 H -7.973616 2.195526 -1.087762  
 F -5.963133 2.414302 2.311329  
 F -5.764972 2.462120 0.108915  
 F -3.801600 -1.019440 1.461513  
 F -3.575822 1.101134 2.015514  
 F -1.822575 0.900404 -1.765873  
 F -1.470962 1.424856 0.345031  
 F 0.550971 -2.196678 -0.128526  
 F 0.737650 -0.110298 0.538274  
 F 2.465840 0.908138 -1.144258  
 F 2.441549 0.134626 -3.204422  
 F 4.973511 0.148304 -2.202401  
 F 5.497994 -1.870469 -1.526650  
 F 5.975411 1.771365 -0.029636  
 F 6.365021 0.509581 1.734732  
 F 8.499968 2.091036 -0.487070  
 F 9.697877 0.299931 -0.915526  
 F 10.944436 1.623877 2.820046  
 F 9.784100 3.110225 1.696058  
 F 12.469637 2.856228 0.998013  
 H 11.102423 2.316916 -0.394795  
 H 11.967786 0.981441 0.420264

**S8: Table of Piezoelectric coefficient measurement by specific capacitance and remnant polarizations**

| Sample code | Young modulus (MPa/mm) | Remnant polarization ( $P_r$ : $\mu\text{C}/\text{cm}^2$ ) | $d_{33}$ ( $C_p V/F$ ) (pC/N) | $d_{33}$ ( $-P_r/Y$ ) (pC/N) |
|-------------|------------------------|------------------------------------------------------------|-------------------------------|------------------------------|
| CNF0        | 726                    | 0.07                                                       | 7.2                           | 9.6                          |
| CNF0.5      | 124                    | 0.15                                                       | 127.6                         | 121.0                        |

|      |     |      |      |      |
|------|-----|------|------|------|
| CNF1 | 263 | 0.09 | 35.0 | 34.2 |
|------|-----|------|------|------|

**Figure S9: a) Frequency, and b, c) force-dependent piezoelectric voltage generation by the device**

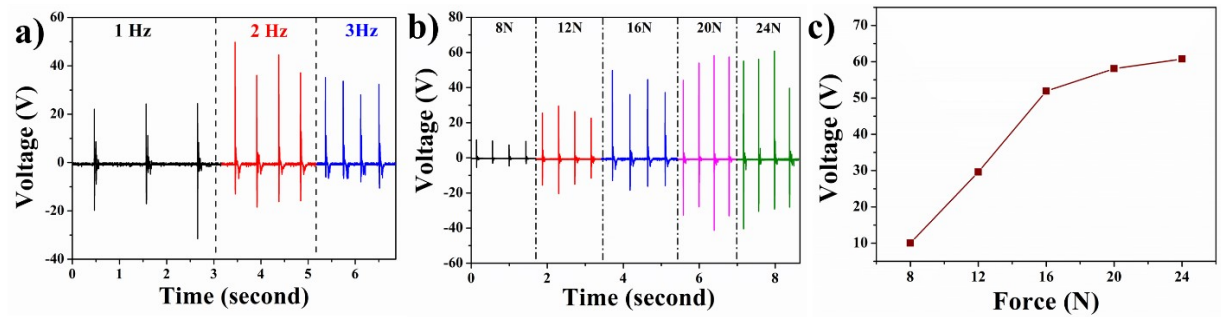

Supplement: d4tc02417f1.pdf [file d4tc02417f1.pdf]
